# Supplementary material for: Meningitic Escherichia coli Induction of ANGPTL4 in Brain Microvascular Endothelial Cells Contributes to Blood–Brain Barrier Disruption via ARHGAP5/RhoA/MYL5 Signaling Cascade
Source: MDPI journal article supplement (doi:10.3390/pathogens8040254), 2019-11-22
Supplement: s1 [file s1]

## Supplemental Figures

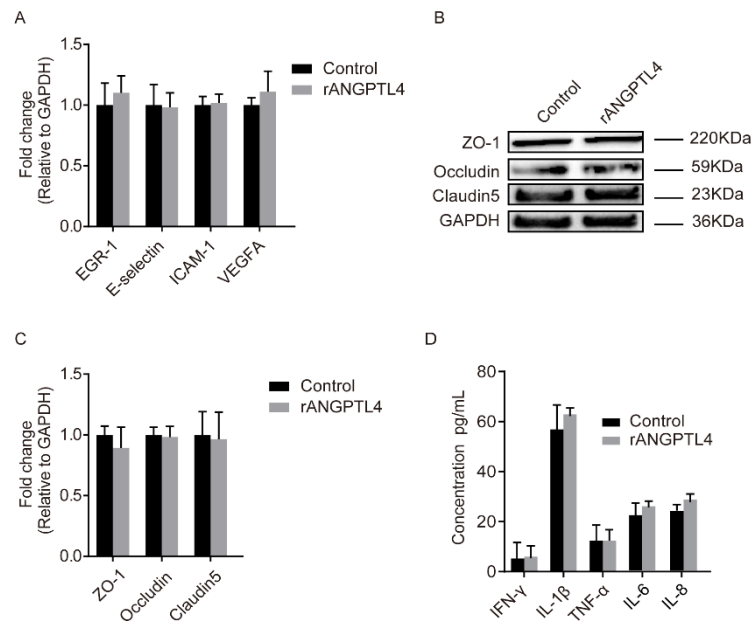

**Figure S1.** The expression of several host molecules probably involving in BBB disruption in response to rANGPTL4. Panel A shows qPCR determining the expression of potential endothelium activation markers in hBMECs with or without rANGPTL4 treatment. Panels B and C show the expression changes of ZO-1, Occludin, and Claudin5 in hBMECs upon rANGPTL4 treatment by Western blotting and densitometry analyses. Panel D exhibits the electrochemiluminescence determining the concentration of multiple cytokines in hBMECs after rANGPTL4 treatment. **Data are presented as mean + SD.**

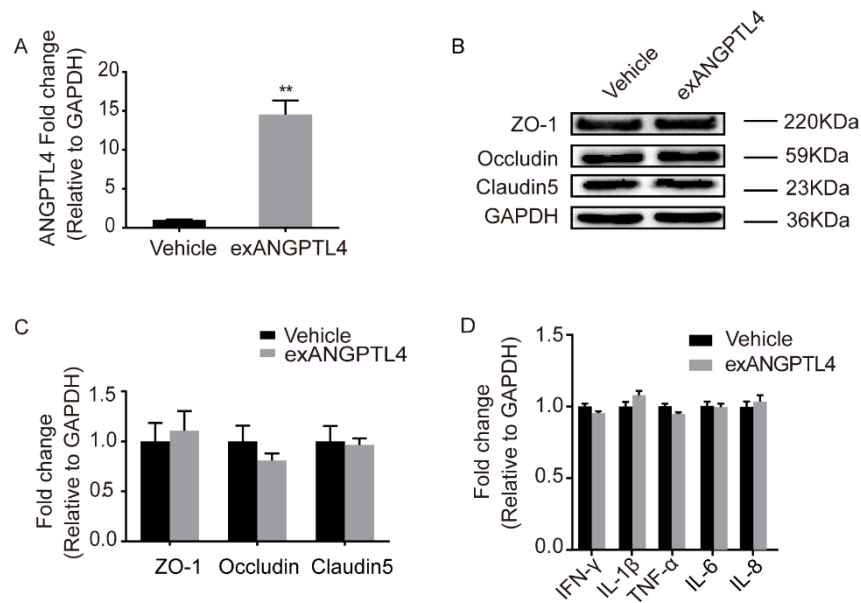

**Figure S2.** The expression of several host molecules probably involving in BBB disruption in ANGPTL4-overexpressed hBMECs. Panel A shows the successful overexpression of ANGPTL4 in hBMECs by qPCR. Panels B and C show the Western blotting and qPCR assays determining the expression of ZO-1, Occludin, and Claudin5 in the ANGPTL4-overexpressed hBMECs. Panel D exhibits the expression of several cytokines in both ANGPTL4-overexpressed hBMECs and control cells. **Data are presented as mean + SD.**
