# Supplementary material for: Meningitic Escherichia coli Induction of ANGPTL4 in Brain Microvascular Endothelial Cells Contributes to Blood–Brain Barrier Disruption via ARHGAP5/RhoA/MYL5 Signaling Cascade
Source: MDPI journal article supplement (doi:10.3390/pathogens8040254), 2019-11-22
Supplement: s1 [file s1]

**Table S1. Enriched KEGG Pathway (p<0.05).**

| KEGG Pathway                                             | P-Value     | Genes                                                                                                  |
|----------------------------------------------------------|-------------|--------------------------------------------------------------------------------------------------------|
| Fanconi anemia pathway                                   | 9.05E-05    | BRCA2 REV3L ATR FANCB BRIP1 FANCM POLK                                                                 |
| Ribosome                                                 | 0.00025866  | Novel00290 Novel00264 RPS28 RPS29 Novel00687 Novel00628 Novel00070<br>Novel00605 Novel00732 Novel00145 |
| Inositol phosphate metabolism                            | 0.006326243 | PIK3CA PIK3C2A PLCE1 Novel00012 PLCB4                                                                  |
| Signaling pathways regulating pluripotency of stem cells | 0.017264823 | RIF1 AXIN2 PIK3CA IL6ST JAK2 SMARCAD1 APC                                                              |
| Pathogenic Escherichia coli infection                    | 0.020671359 | WAS Novel00839 ROCK1 Novel00854                                                                        |
| Leukocyte transendothelial migration                     | 0.023398716 | Novel00661 PIK3CA ROCK1 MYL5 ARHGAP5 CLDN2                                                             |
| Shigellosis                                              | 0.028330759 | U2AF1 WAS Novel00661 ROCK1                                                                             |
| Colorectal cancer                                        | 0.029750405 | PIK3CA Novel00661 AXIN2 APC                                                                            |
| Fanconi anemia pathway                                   | 9.05E-05    | BRCA2 REV3L ATR FANCB BRIP1 FANCM POLK                                                                 |
| Ribosome                                                 | 0.00025866  | Novel00290 Novel00264 RPS28 RPS29 Novel00687 Novel00628 Novel00070<br>Novel00605 Novel00732 Novel00145 |
| Inositol phosphate metabolism                            | 0.006326243 | PIK3CA PIK3C2A PLCE1 Novel00012 PLCB4                                                                  |
| Signaling pathways regulating pluripotency of stem cells | 0.017264823 | RIF1 AXIN2 PIK3CA IL6ST JAK2 SMARCAD1 APC                                                              |
