# Supplementary material for: Meningitic Escherichia coli Induction of ANGPTL4 in Brain Microvascular Endothelial Cells Contributes to Blood–Brain Barrier Disruption via ARHGAP5/RhoA/MYL5 Signaling Cascade
Source: MDPI journal article supplement (doi:10.3390/pathogens8040254), 2019-11-22
Supplement: s1 [file s1]

**Table S2. The list of primers for qPCR.**

| Primers         | Sequence (5'-3')         |
|-----------------|--------------------------|
| ANGPTL4-F       | GGCTCAGTGGACTTCAACCG     |
| ANGPTL4-R       | CCGTGATGCTATGCACCTTCT    |
| PPARD-F         | GCCTCTATCGTCAACAAGGAC    |
| PPARD-R         | GCAATGAATAGGGCCAGGTC     |
| PPARG-F         | GGGATCAGCTCCGTGGATCT     |
| PPARG-R         | TGCACTTTGGTACTCTTGAAGTT  |
| EGR-1-F         | GGACAAGAAAGCAGACAA       |
| EGR-1-R         | GGATGGATAAGAGGTAGTAAC    |
| E-selectin-F    | AGTCCTCTTGTGCCTTCA       |
| E-selectin-R    | AACCTCTTCTGTCCATTGTC     |
| ICAM-1-F        | GTAGCAGCCGCAGTCATAA      |
| ICAM-1-R        | GCCTGTTGTAGTCTGTATTTCTTG |
| VEGFA-F         | TGCCTTGCTGCTCTACCT       |
| VEGFA-R         | GACATCCATGAACTTCACCACTT  |
| ZO-1-F          | GACTTAAAGCTGCCTCAACAGA   |
| ZO-1-R          | GGTTTGTTCAGGCGAAAGG      |
| Occludin-F      | TTAACTTCGCCTGTGGAT       |
| Occludin-R      | AGTGATCTTGCTCTGTTCT      |
| Claudin-5-F     | CCCAGAGGCTCCTGCTGAC      |
| Claudin-5-R     | GCAGATTCTTAGCCTTCCCACTCC |
| IFN $\gamma$ -F | GGGTTCCTTGGCTGTTACTG     |
| IFN $\gamma$ -R | GAGTTCCATTATCCGCTACATCTG |
| IL-1 $\beta$ -F | ATGATGGCTTATTACAGTGGCAA  |
| IL-1 $\beta$ -R | GTCGGAGATTCGTAGCTGGA     |

---

|                 |                          |
|-----------------|--------------------------|
| TNF $\alpha$ -F | GCGGTGCTTGTCCTCAG        |
| TNF $\alpha$ -R | GGCTACAGGCTTGTCACCTC     |
| IL-6-F          | ACTCACCTCTTCAGAACGAATTG  |
| IL-6-R          | CCATCTTTGGAAGGTTTCAGGTTG |
| IL-8-F          | TTTTGCCAAGGAGTGCTAAAGA   |
| IL-8-R          | AACCCTCTGCACCCAGTTTTC    |
| CLDN2-F         | GCCTCTGGATGGAATGTGCC     |
| CLDN2-R         | GCTACCGCCACTCTGTCTTTG    |
| ROCK1-F         | AACATGCTGCTGGATAAATCTGG  |
| ROCK1-R         | TGTATCACATCGTACCATGCCT   |
| ARHGAP5-F       | AGGGAAGCTCAACGTAGATGG    |
| ARHGAP5-R       | ATGATCCACGCATTCATCACAT   |
| MYL5-F          | ACACTCATGGATCAGAACCGA    |
| MYL5-R          | GCGTTAAGAATGGTCTCCTCG    |
| PIK3CA-F        | CCACGACCATCATCAGGTGAA    |
| PIK3CA-R        | CCTCACGGAGGCATTCTAAAGT   |
| RhoA-F          | ACCAGTTCCCAGAGGTTTATGT   |
| RhoA-R          | TTTGGTCTTTGCTGAACACT     |

---
